# Supplementary material
Source: PubMed Central journal article supplement (PMC7201194)
Supplement: NIHMS1569417-supplement-2.pdf [file NIHMS1569417-supplement-2.pdf]

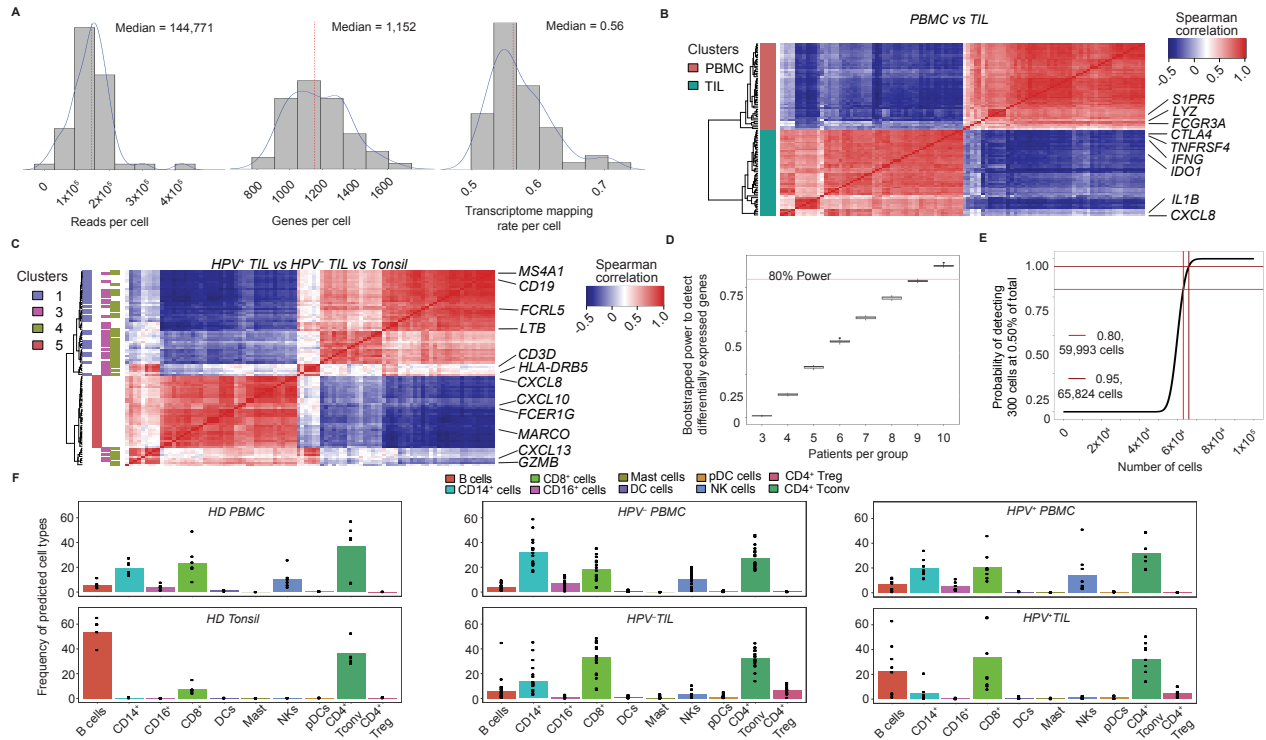

**Figure S1. Single-cell RNAseq metrics, post-hoc assessment of power, and frequencies of cells per sample type, related to Figure 1.** (A) Single-cell RNAseq metrics for all samples. We sequenced to a median depth of >100,000 reads/cell, recovered a median of >1,000 genes/cell, and had a transcriptome mapping rate of 56%. (B) Pseudobulk RNAseq analysis comparing PBMC versus TIL. Top differentially expressed genes in PBMC were those associated with peripheral blood myeloid cells (e.g. *LYZ* and *FCGR3A*), while those in TIL were reflective of immunoregulatory genes (e.g. *CTLA4* and *IDO1*) and inflammatory cytokines (e.g. *IFNG* and *IL1B*). (C) Pseudobulk RNAseq analysis comparing cluster of tissue resident cells. Clusters 1, 3 and 4 had signatures reflective of B cells (e.g. *MS4A1* and *CD19*) and T cells (*CD3D*), while cluster 5 consisted of genes associated with chemokines (e.g. *CXCL8* and *CXCL10*) and TIL myeloid cells (e.g. *FCER1A* and *MARCO*). (D-E) We performed two post-hoc power analyses to determine the minimum number of samples. First, we performed a bootstrapped power analysis on the pseudobulk data (D), using the mean and standard deviation of each gene across samples to generate synthetic data, and then comparing the number of differentially expressed genes between groups. This analysis revealed that in a balanced study design, we would require 9 samples each from tonsil, HPV<sup>-</sup> TIL and HPV<sup>+</sup> TIL to recover ~80% of the differentially expressed genes in our study. Second, we used a

negative binomial distribution to determine the number of cells required from TIL to have an 80% and 95% probability of detecting 300 cells present at a frequency of 0.5% (which was approximately the frequency of mast cells, i.e. the rarest cell type recovered, in TIL samples). We found that ~60,000 cells would provide an 80% probability of recovering this population of mast cells, and notably our dataset contained 59,599 TIL cells (E). (F) Frequencies of cells identified by single-cell RNAseq from each patient, across all sample groups

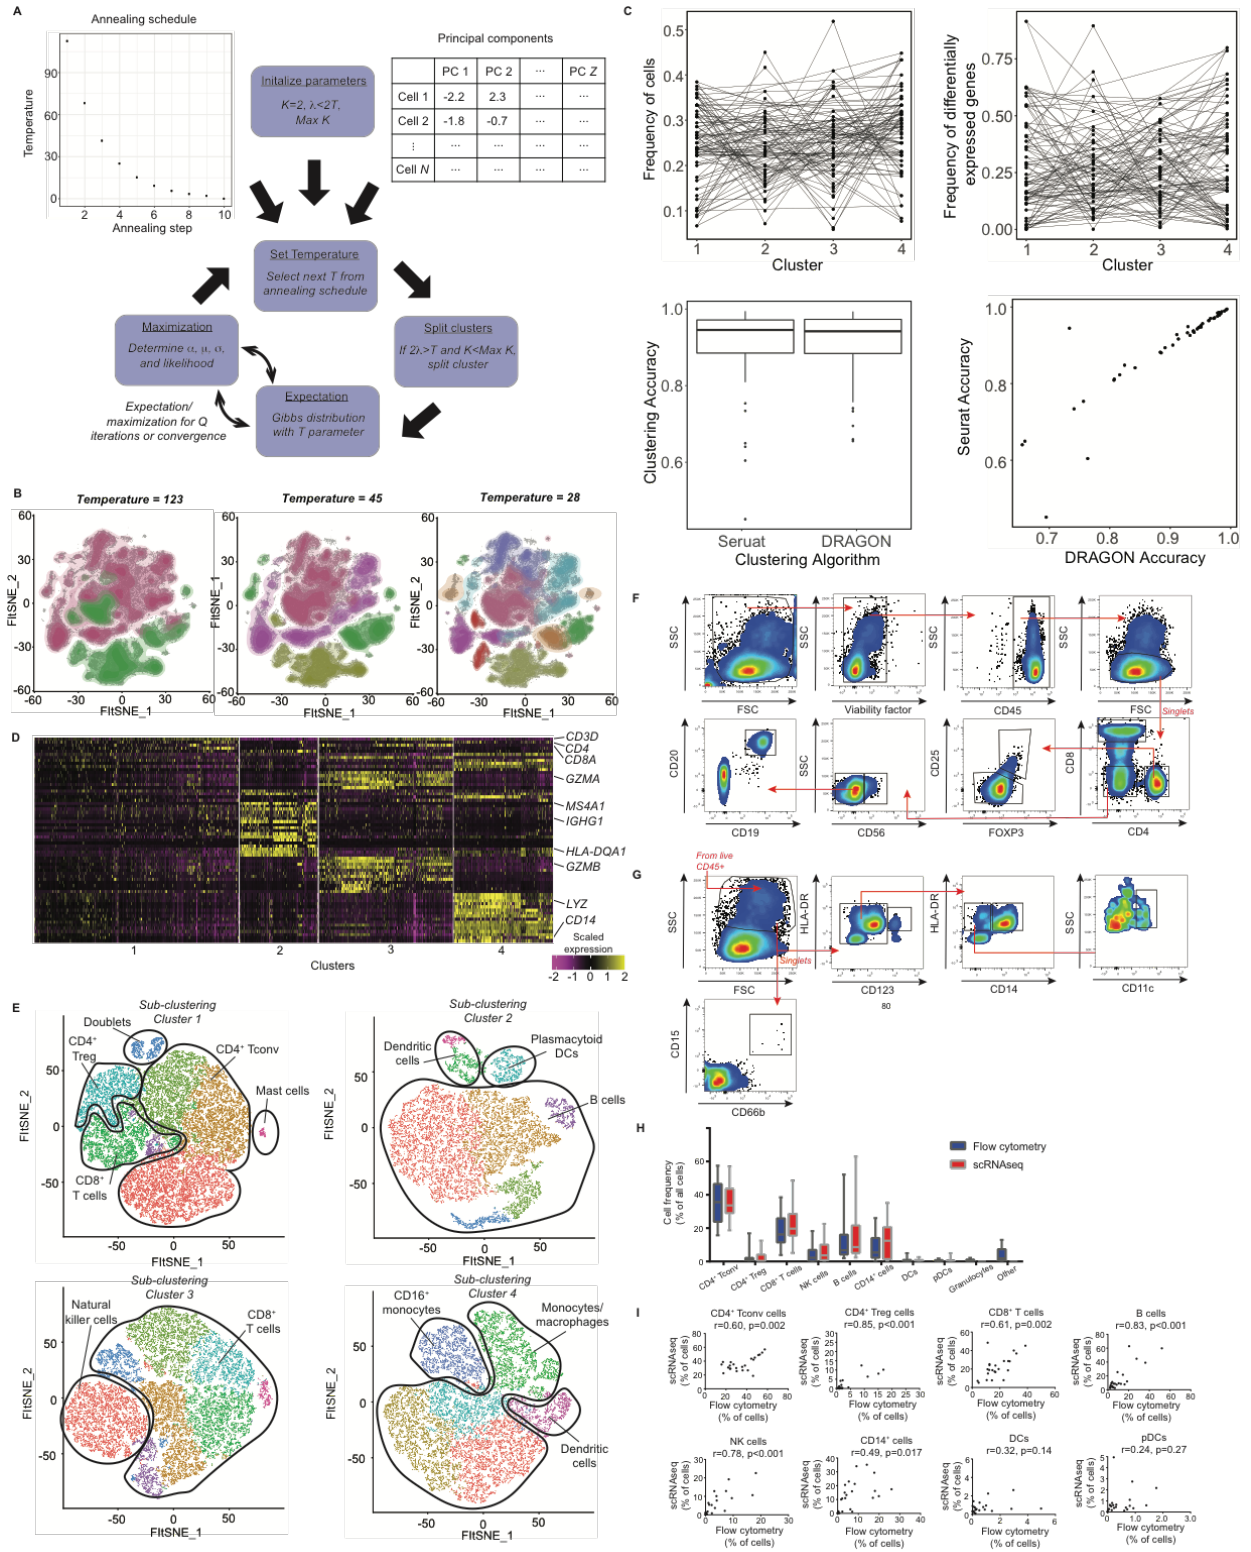

**Figure S2. DRAGON clustering and identification of cell types, related to Figure 1.** A model-based clustering algorithm combining deterministic annealing and Gaussian mixture models was developed for clustering of single-cell RNAseq data. (A) DRAGON takes as input an annealing schedule of “temperatures”, the principal components embedding of the cells, and the maximum number of clusters. After initialization, the algorithm enters a loop where the temperature is selected from the annealing schedule, clusters are split if the temperature is less than 2 times the eigenvalue of the cluster, and then expectation/maximization based on a Gibbs distribution with temperature as an agitation parameter that seeks to maximize the parameters of the Gaussian mixture model. After convergence or a set number of iterations, the temperature is lowered and the loop begins again to allow the system to anneal. This process prevents the clustering algorithm from becoming trapped in local minima, allows for the assessment of clusters as the temperature decreases, provides a rationale for cluster genesis, and is highly parallelizable for large datasets. (B) Results at decreasing annealing temperatures for all single-cells from our dataset. The strongest separations between clusters are evident at the higher temperatures, and more subtle separations become evident as the system is gradually cooled. (C) To benchmark DRAGON versus Louvian clustering, we generated 50 instances of synthetic data using splatter (STAR Methods). We used a framework where there were 4 clusters, with varying frequencies of cells in each cluster. The top two panels show the frequencies of cells per cluster and the number of differentially expressed genes per cluster for each of the synthetic datasets. We used confusion matrices to compare the accuracy of DRAGON and Louvian clustering versus ground truth (bottom panels), and found that both algorithms were highly accurate (90.6% and 90.3% accuracy, respectively) and correlated ( $\rho=0.90$ ,  $p<0.001$ ). (D) Differentially expressed genes across clusters from Temperature=45 in (B) revealed separation between lineage-defining markers across immune cells. (E) Sub-clustering of each of the 4 clusters from Temperature=45 in (B) and identification of immune lineages. (F-G) Flow cytometric gating to identify major immune lineages in lymphocytes (F) and myeloid cells (G). (H) Comparison of bioinformatically inferred cell types and populations identified by flow cytometry strongly agreed. (I) Correlations between cell populations identified by flow cytometry versus those inferred bioinformatically.

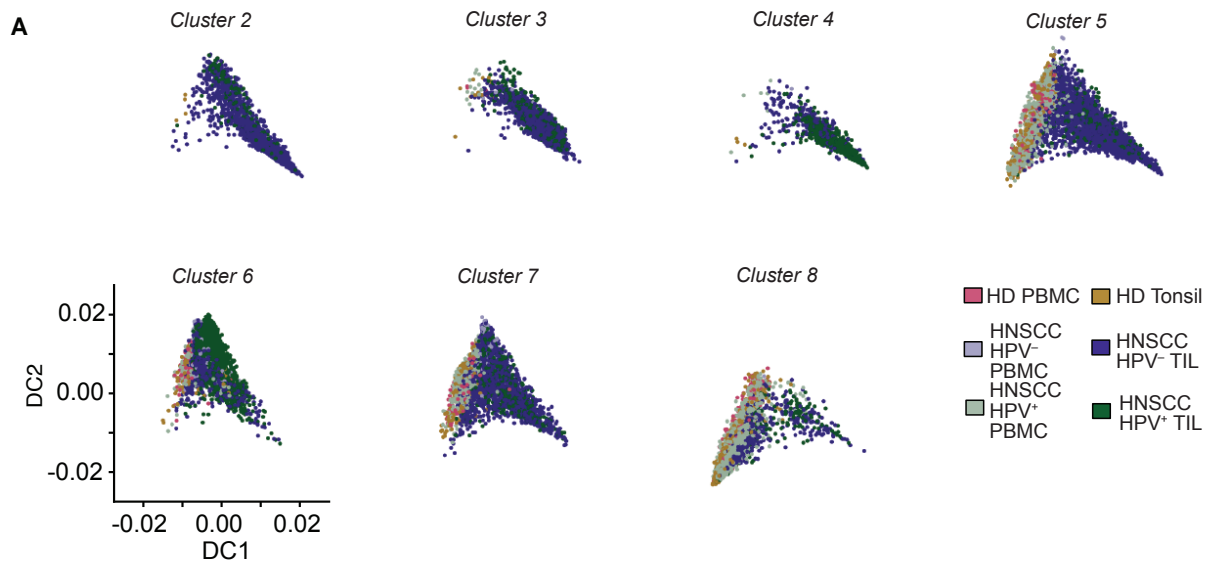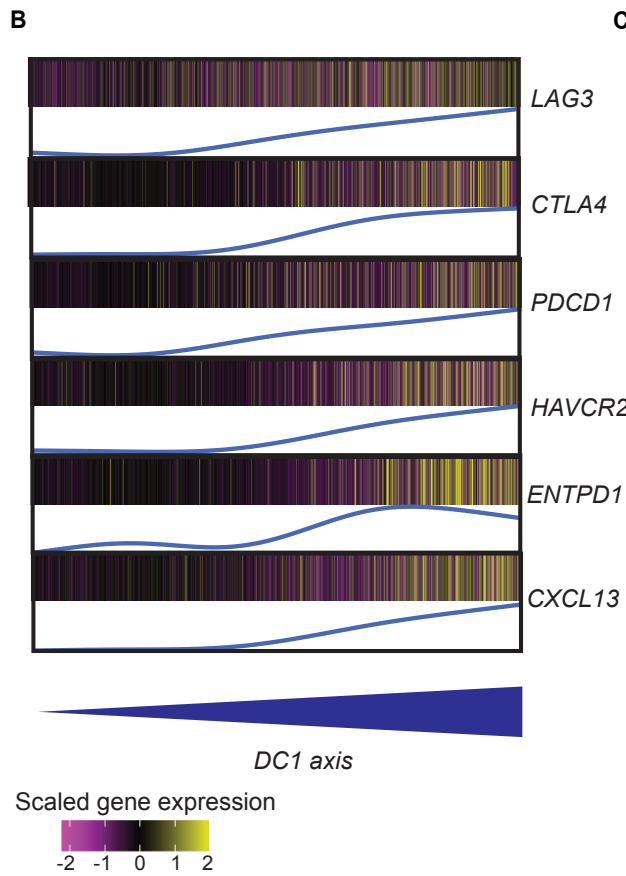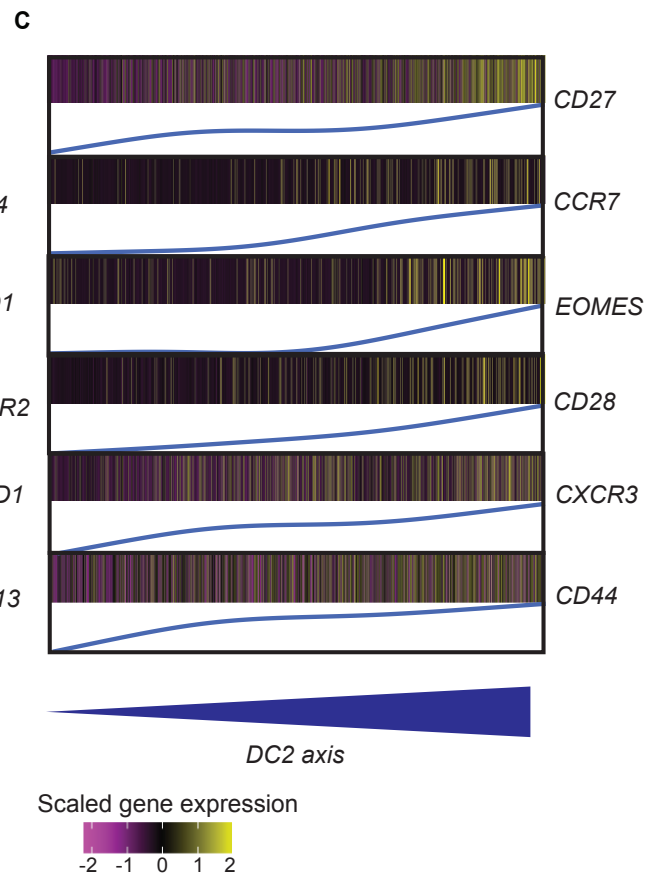

**Figure S3. CD8<sup>+</sup> T cells from HPV<sup>-</sup> and HPV<sup>+</sup> TIL share a differentiation trajectory, related to Figure 2.** Diffusion map embedding was performed using clusters 2-8 of CD8<sup>+</sup> T cells (cluster 1 was excluded due to high expression of genes associated with the cell cycle). (A) Diffusion map embedding of each cluster of CD8<sup>+</sup> T cells demonstrates how each of these clusters relate to the differentiation trajectory. (B) To determine the genes associated with differentiation of CD8<sup>+</sup> T cells, we performed linear modeling between gene expression levels and the DC1 axis. Genes for known co-inhibitory receptors such as *LAG3*, *CTLA4*, *PDCD1* (gene for PD1), and *HAVCR2* (gene for TIM3) were highly associated with DC1, as were *ENTPD1* (gene for CD39) and *CXCL13*. (C) We also assessed genes associated with the DC2 axis, and found genes associated with effector memory cells such as *CCR7* (to control trafficking to lymph nodes), *EOMES* (required for memory formation), *CD27* and *CD28* (associated with memory cells).

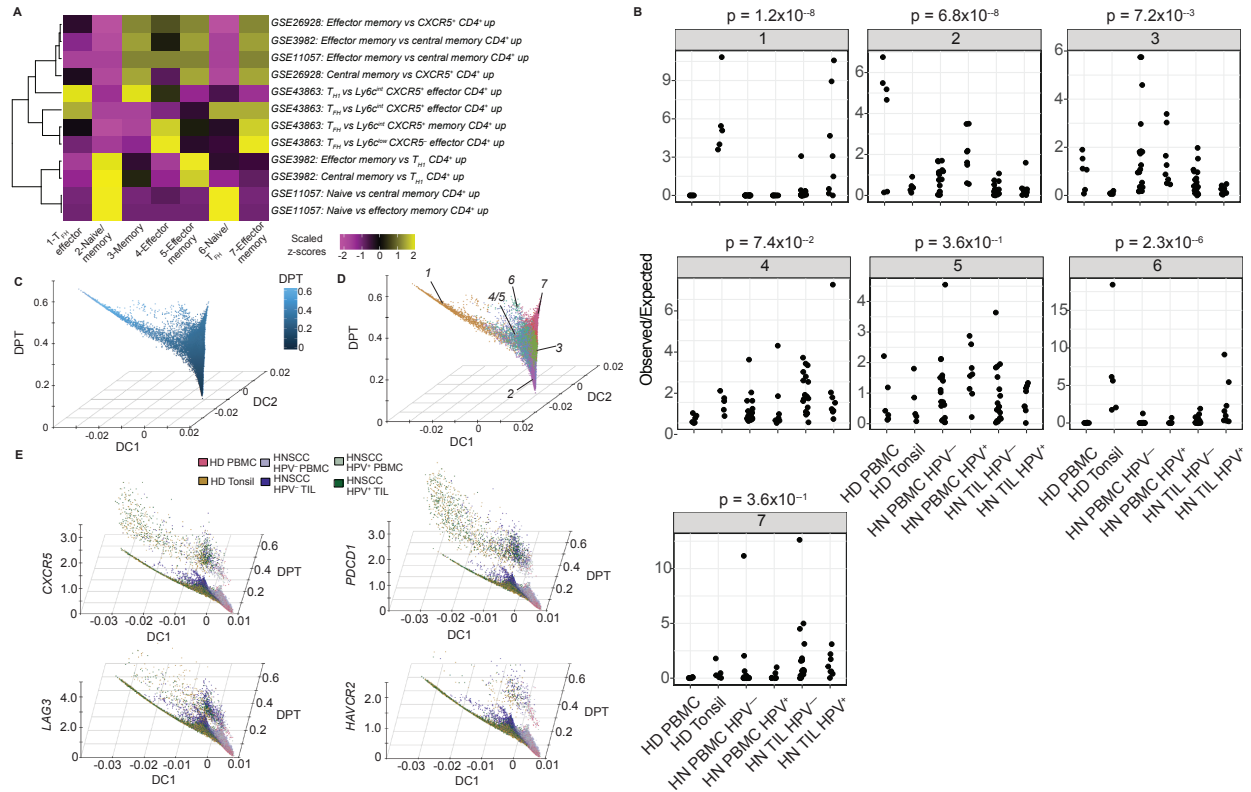

**Figure S4. Elucidation of biological roles of CD4<sup>+</sup> Tconv clusters, and diffusion map embedding of differentiation trajectories, related to Figure 3.** (A) Gene set enrichment analysis of CD4<sup>+</sup> Tconv clusters using CD4<sup>+</sup> Tconv related gene sets from the C7 collection of MSigDB. Curated gene sets are shown to highlight clusters found to be associated with naïve and memory states (clusters 2 and 6) and various stages of effector, type-1 helper (TH1) and TFH development. (B) Diffusion map embedding with DC1 and DC2 on the x and z axes, and diffusion pseudotime (DPT) on the y axis, colored by diffusion pseudotime (DPT). (C) Same diffusion map embedding as (B), but with colored by clusters from Figure 3A. (D) Diffusion map embeddings of DC1 (x axis), DPT (z axis) and individual gene expression levels (y axis). Expression of *PDCD1* and *CXCR5* is bimodal with respect to DC1 and DPT (top two panels), consistent with expression during early activation and in a differentiated TFH state. Conversely, *LAG3* and *HAVCR2* are co-expressed with *PDCD1* prior to the point where differentiation to TFH occurs, suggesting that co-inhibitory receptor expression may prevent CD4<sup>+</sup> Tconv differentiation. (E) To determine whether there were statistically significant associations between clusters and samples types for CD4<sup>+</sup> Tconv, we generated a metric for the observed versus expected frequencies of cells in each cluster, where each dot represent a patient from

a given sample type (STAR Methods). We then performed ANOVA on each cluster, with the resulting p values displayed above each numbered cluster. The resulted in the identification of statistically significant associations between sample type and clusters 1, 2, 3, and 6. Importantly, we also compared HN TIL HPV<sup>-</sup> CD4<sup>+</sup> Tconv and HN TIL HPV<sup>+</sup> CD4<sup>+</sup> Tconv for cluster 1, and found that they were statistically significantly different (p=0.0044, rank sum test).



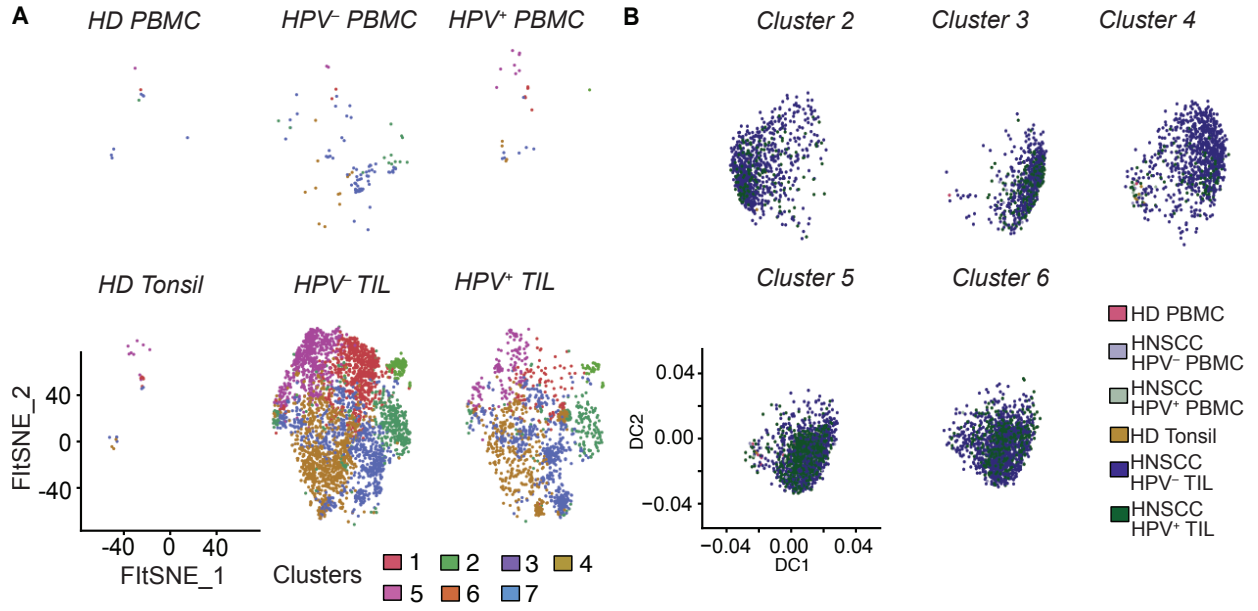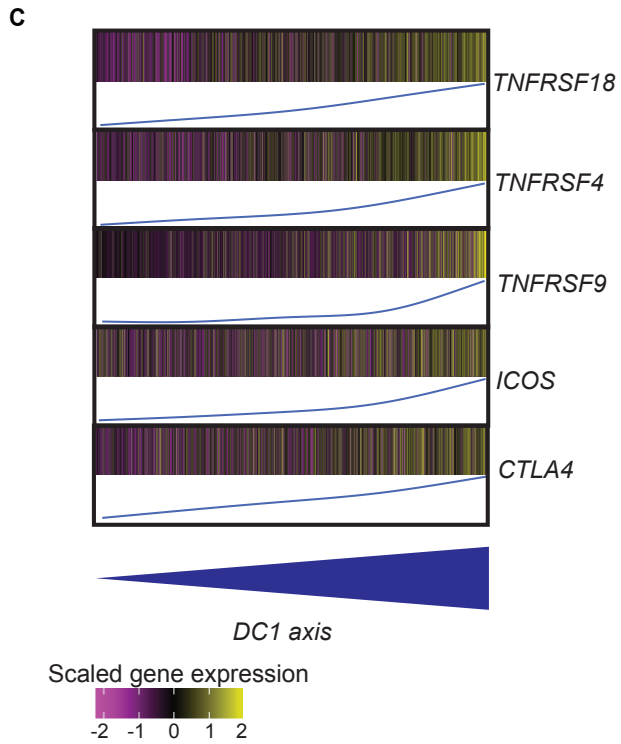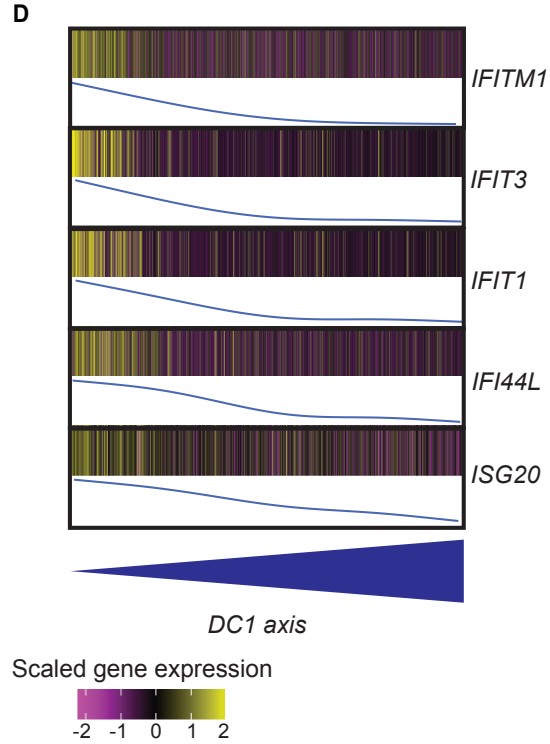

**Figure S5. CD4<sup>+</sup> Treg exhibit a conserved differentiation trajectory in HPV<sup>-</sup> and HPV<sup>+</sup> TIL, related to Figure 3.** Pseudotime derived from diffusion map embedding revealed expression of TNF-family receptors following activation. (A) The same tSNE embedding of CD4<sup>+</sup> Treg as in Figure 3, but showing each of the sample types (with the plots colored by clusters, as in Figure 3). (B) Diffusion map showing the locations of each of the clusters identified in Figure 3F. Clusters 2 and 4 are both enriched for IFN-responsive gene sets and are found at early diffusion pseudotime (DPT), while clusters 3 and 6 are enriched for TNF-family receptor genes and are found at later DPT. Cluster 5 is potentially a transient state linking the IFN-responsive and TNFR-superfamily states. (C) Genes positively associated with the DC1 component of the diffusion map embedding. Notably, TNF-family receptors, co-stimulatory molecules and Treg effector molecules are associated with DC1. (D) Conversely, top genes that are negatively associated with DC1 include members of the IFN-response gene family.

A

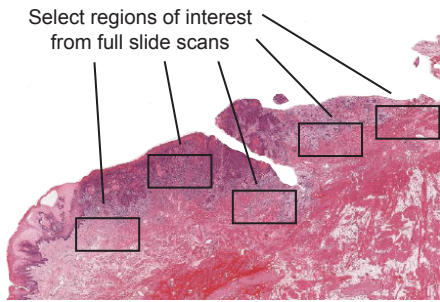

B

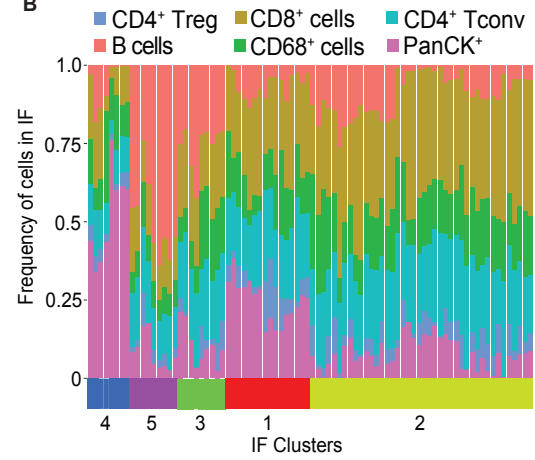

C

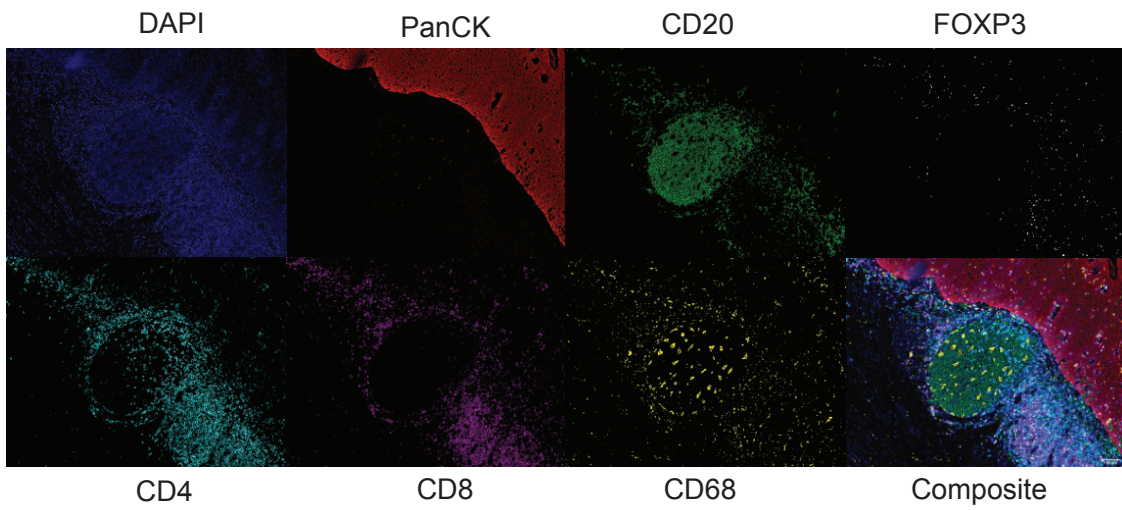

D

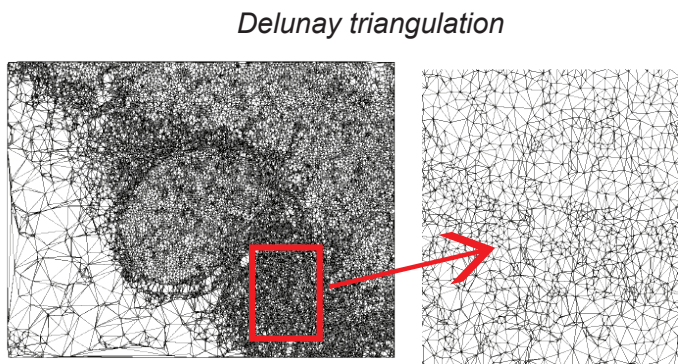

**Figure S6. Representative immunofluorescence data, identification of cell type frequencies, and workflow for log odds ratio of cell-cell neighbors, related to Figure 7.** Immunofluorescence analysis was used to characterize spatial relationships in tissue samples. (A) Regions of interest were selected based on H&E staining in addition to whole slide scans. (B) Quantification of cell types as a frequency of potential cell types identifiable by our IF panel. The clustering as a result of the frequencies of cells in a given image (derived from Figure 7A) is shown on the x axis. (C) Representative individual channels and composite images from the immunofluorescence workflow. (D) Representative Delunay triangulation analysis from the slide in (C) on the entire image (left) and a zoomed in section of the image (right). Delunay triangulation was used to determine the neighbors of a given cell type in 2 dimensional images.

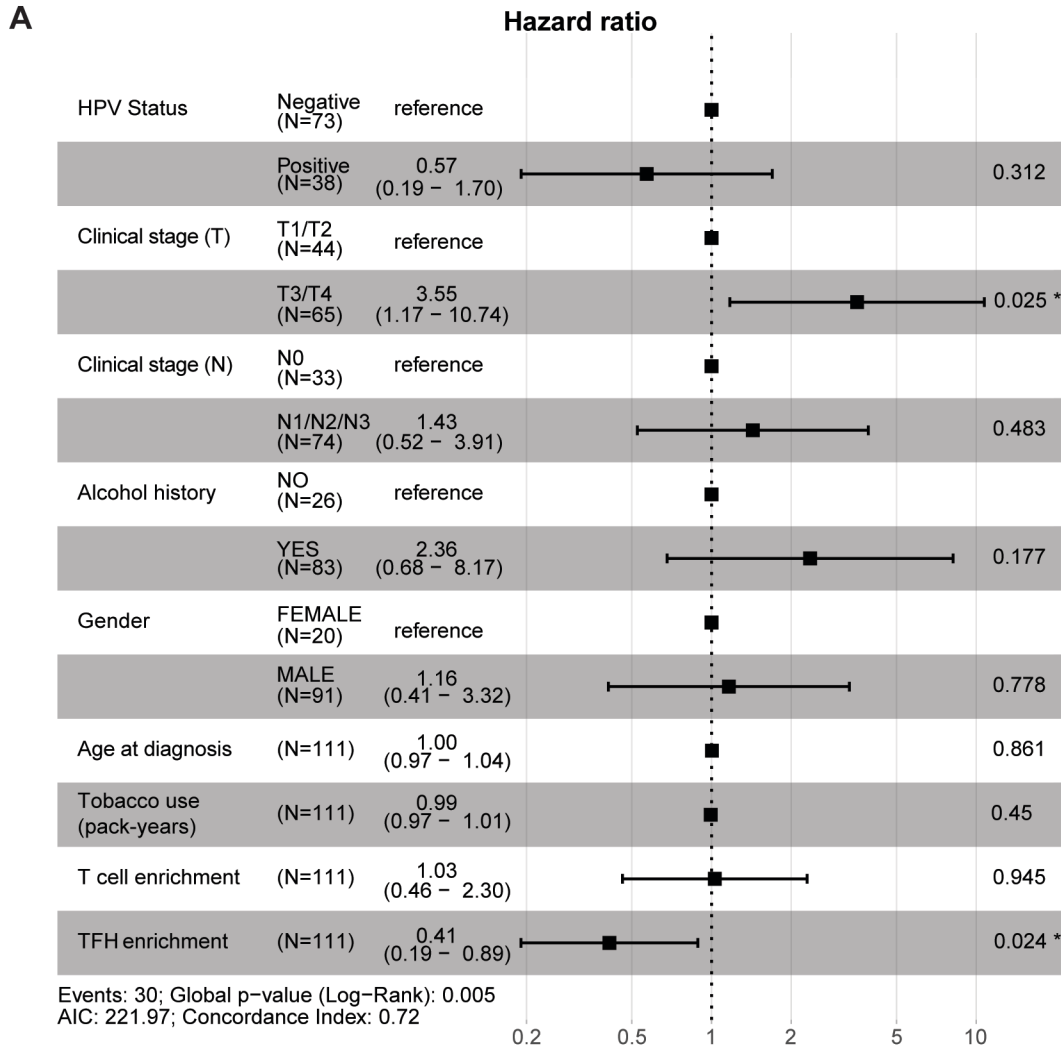

**Figure S7. Multivariate progression free survival analysis shows TFH enrichment remains statistically significant after correcting for potentially confounding covariates, related to Figure 7.**

(A) Multivariate analysis of progression free survival by covariates and TFH enrichment. Notably, TFH enrichment remained a statistically significant independent predictor of longer progression free interval in this multivariate analysis.
